# Supplementary material for: Machine Learning Algorithm to Predict Obstructive Coronary Artery Disease: Insights from the CorLipid Trial
Source: MDPI journal article supplement (doi:10.3390/metabo12090816), 2022-08-30
Supplement: s1 [file s1]

# Supplementary material

## Evaluation metrics

1.  $TP = \sum_{i=1}^N (\hat{y}_i = 1 | y_i = 1)$
2.  $FP = \sum_{i=1}^N (\hat{y}_i = 1 | y_i = 0)$
3.  $TN = N_n - FP$
4.  $FN = N_p - TP$
5.  $Logloss = -\frac{1}{N} \sum_{i=1}^N [y_i \ln p_i + (1 - y_i) \ln (1 - p_i)]$
6.  $Accuracy = \frac{TP + TN}{TP + TN + FP + FN}$
7.  $Precision = \frac{TP}{TP + FP}$
8.  $Recall / Sensitivity = \frac{TP}{TP + FN}$
9.  $F1 = 2 * \frac{Precision * Recall}{Precision + Recall}$
10.  $Specificity = \frac{TN}{TN + FP}$

## Abbreviations:

$y$  : the actual/true value,

$\hat{y}$  : the predicted value,

$p$  : the predicted probability for a sample to belong in positive class,

$\ln$  : the natural logarithm,

$N$  : the number of samples (observations) in dataset,

$N_p$  : the number of samples in dataset belonging in positive class ( $y = 1$ ),

$N_n$  : the number of samples in dataset belonging in negative class ( $y = 0$ ),

**Table S1.** Hyperparameters optimized for Extreme Gradient Boosting Classifier (XGBClassifier) predictive algorithm and the ranges of investigated values. The names of the parameters are identical to the names that appear in the corresponding Python library.

| Predictive Algorithm                 |  |  | Hyperparameter | Investigated values |
|--------------------------------------|--|--|----------------|---------------------|
| XGBClassifier                        |  |  | n_estimators   | randint(10, 200)    |
| Extreme Gradient Boosting Classifier |  |  | max_depth      | randint(1, 12)      |
|                                      |  |  | learning_rate  | uniform(0.01, 0.25) |
|                                      |  |  | gamma          | uniform(0.0, 10.0)  |
|                                      |  |  | reg_alpha      | uniform(0.0, 10.0)  |
|                                      |  |  | reg_lambda     | uniform(0.0, 10.0)  |

*uniform()* - randomly and uniformly select a float number from the range defined in parentheses; *randint()* - randomly and uniformly select an integer number from the range defined in parentheses

**Table S2.** SYNTAX Score Groups descriptive statistics.

|                             |        | Syntax Score Groups |         |                     |         |                  |         | P value*(pair)                 |
|-----------------------------|--------|---------------------|---------|---------------------|---------|------------------|---------|--------------------------------|
|                             |        | 0 ( $\alpha$ )      |         | 1 to 22 ( $\beta$ ) |         | >22 ( $\gamma$ ) |         |                                |
| Sex                         | Female | 103                 | 37.20%  | 99                  | 21.00%  | 53               | 25.20%  | 0.009 ( $\alpha$ - $\gamma$ )  |
|                             | Male   | 174                 | 62.80%  | 372                 | 79.00%  | 157              | 74.80%  | <0.001 ( $\alpha$ - $\beta$ )  |
|                             | Total  | 277                 | 100.00% | 471                 | 100.00% | 210              | 100.00% |                                |
| Hypertension                | No     | 132                 | 47.70%  | 194                 | 41.20%  | 72               | 34.30%  | 0.009 ( $\alpha$ - $\gamma$ )  |
|                             | Yes    | 145                 | 52.30%  | 277                 | 58.80%  | 138              | 65.70%  |                                |
|                             | Total  | 277                 | 100.00% | 471                 | 100.00% | 210              | 100.00% |                                |
| Diabetes Mellitus           | No     | 206                 | 74.40%  | 322                 | 68.40%  | 114              | 54.30%  | <0.001 ( $\alpha$ - $\gamma$ ) |
|                             | Yes    | 71                  | 25.60%  | 149                 | 31.60%  | 96               | 45.70%  | 0.001 ( $\beta$ - $\gamma$ )   |
|                             | Total  | 277                 | 100.00% | 471                 | 100.00% | 210              | 100.00% |                                |
| Dyslipidaemia               | No     | 180                 | 65.00%  | 283                 | 60.10%  | 131              | 62.40%  | 0.429                          |
|                             | Yes    | 97                  | 35.00%  | 187                 | 39.70%  | 79               | 37.60%  |                                |
|                             | Total  | 277                 | 100.00% | 470                 | 100.00% | 210              | 100.00% |                                |
| Family history              | No     | 235                 | 84.80%  | 383                 | 81.30%  | 170              | 81.00%  | 0.428                          |
|                             | Yes    | 42                  | 15.20%  | 87                  | 18.50%  | 40               | 19.00%  |                                |
|                             | Total  | 277                 | 100.00% | 470                 | 100.00% | 210              | 100.00% |                                |
| Smoking                     | No     | 182                 | 65.70%  | 231                 | 49.00%  | 122              | 58.10%  | <0.001 ( $\alpha$ - $\beta$ )  |
|                             | Yes    | 95                  | 34.30%  | 240                 | 51.00%  | 88               | 41.90%  |                                |
|                             | Total  | 277                 | 100.00% | 471                 | 100.00% | 210              | 100.00% |                                |
| Age (groups)                | 65<    | 150                 | 54.20%  | 268                 | 56.90%  | 86               | 41.00%  | <0.001 ( $\beta$ - $\gamma$ )  |
|                             | 65>    | 127                 | 45.80%  | 201                 | 42.70%  | 124              | 59.00%  | 0.01 ( $\alpha$ - $\gamma$ )   |
|                             | Total  | 277                 | 100.00% | 469                 | 100.00% | 210              | 100.00% |                                |
| Previous Stroke             | No     | 271                 | 97.80%  | 456                 | 96.80%  | 202              | 96.20%  | 0.669                          |
|                             | Yes    | 6                   | 2.20%   | 15                  | 3.20%   | 7                | 3.30%   |                                |
|                             | Total  | 277                 | 100.00% | 471                 | 100.00% | 209              | 100.00% |                                |
| Peripheral vascular disease | No     | 269                 | 97.10%  | 452                 | 96.00%  | 193              | 91.90%  | 0.01 ( $\alpha$ - $\gamma$ )   |
|                             | Yes    | 7                   | 2.50%   | 19                  | 4.00%   | 17               | 8.10%   |                                |
|                             | Total  | 276                 | 100.00% | 471                 | 100.00% | 210              | 100.00% |                                |
| Aortic aneurysms            | No     | 258                 | 93.10%  | 466                 | 98.90%  | 204              | 97.10%  | <0.001 ( $\alpha$ - $\beta$ )  |
|                             | Yes    | 19                  | 6.90%   | 5                   | 1.10%   | 5                | 2.40%   | 0.013 ( $\alpha$ - $\gamma$ )  |

|                                                                     |       |     |         |     |         |     |         |                                                                |
|---------------------------------------------------------------------|-------|-----|---------|-----|---------|-----|---------|----------------------------------------------------------------|
| <b>Chronic pulmonary obstructive disease</b>                        | Total | 277 | 100.00% | 471 | 100.00% | 209 | 100.00% | 0.470                                                          |
|                                                                     | No    | 258 | 93.10%  | 445 | 94.50%  | 201 | 95.70%  |                                                                |
|                                                                     | Yes   | 19  | 6.90%   | 26  | 5.50%   | 9   | 4.30%   |                                                                |
| <b>Autoimmune disease</b>                                           | Total | 277 | 100.00% | 471 | 100.00% | 210 | 100.00% | 0.099                                                          |
|                                                                     | No    | 270 | 97.50%  | 467 | 99.20%  | 204 | 97.10%  |                                                                |
|                                                                     | Yes   | 7   | 2.50%   | 4   | 0.80%   | 6   | 2.90%   |                                                                |
| <b>Atrial fibrillation</b>                                          | Total | 277 | 100.00% | 471 | 100.00% | 210 | 100.00% | 0.033 ( $\alpha$ - $\gamma$ )<br>0.015 ( $\alpha$ - $\beta$ )  |
|                                                                     | No    | 235 | 84.80%  | 430 | 91.30%  | 193 | 91.90%  |                                                                |
|                                                                     | Yes   | 42  | 15.20%  | 41  | 8.70%   | 17  | 8.10%   |                                                                |
| <b>Known CAD</b>                                                    | Total | 277 | 100.00% | 471 | 100.00% | 210 | 100.00% | 0.01 ( $\alpha$ - $\gamma$ )                                   |
|                                                                     | No    | 227 | 81.90%  | 384 | 81.50%  | 170 | 81.00%  |                                                                |
|                                                                     | Yes   | 5   | 1.80%   | 24  | 5.10%   | 20  | 9.50%   |                                                                |
| <b>Kidney GFR&lt;55</b>                                             | Total | 232 | 100.00% | 408 | 100.00% | 190 | 100.00% | <0.001 ( $\alpha$ - $\gamma$ )<br>0.005 ( $\beta$ - $\gamma$ ) |
|                                                                     | No    | 246 | 88.80%  | 412 | 87.50%  | 160 | 76.20%  |                                                                |
|                                                                     | Yes   | 25  | 9.00%   | 58  | 12.30%  | 44  | 21.00%  |                                                                |
| Total                                                               |       | 271 | 100.00% | 470 | 100.00% | 204 | 100.00% |                                                                |
| * Bonferroni corrected for multiple comparisons Kruskal Wallis test |       |     |         |     |         |     |         |                                                                |

**Table S3.** Biochemical parameters per SYNTAX Score group

|                                         | SYNTAX Score    |          |                     |          |                  |          | P value*(pair)                                                                               |
|-----------------------------------------|-----------------|----------|---------------------|----------|------------------|----------|----------------------------------------------------------------------------------------------|
|                                         | 0 ( $\alpha$ )  |          | 1 to 22 ( $\beta$ ) |          | >22 ( $\gamma$ ) |          |                                                                                              |
|                                         | Mean( $\pm$ SD) | $\pm$ SD | Mean                | $\pm$ SD | Mean             | $\pm$ SD |                                                                                              |
| BMI                                     | 28.47 (4.8)     | 4.8      | 28.61               | 4.62     | 28.4             | 4.23     | 0.853                                                                                        |
| Grace score                             | 89(31)          | 31       | 107                 | 36       | 119              | 36       | <0.001 ( $\alpha$ - $\beta$ ), <0.001 ( $\alpha$ - $\gamma$ ), <0.001 ( $\beta$ - $\gamma$ ) |
| Total glucose                           | 96.09(33.16)    | 33.16    | 95.65               | 36.17    | 84.61            | 36.59    | 0.002 ( $\alpha$ - $\gamma$ ), 0.001 ( $\beta$ - $\gamma$ )                                  |
| Creatinine                              | 107.86          | 61.54    | 123.06              | 56.66    | 135.09           | 57.46    | <0.001 ( $\alpha$ - $\beta$ ), <0.001 ( $\alpha$ - $\gamma$ ), 0.001 ( $\beta$ - $\gamma$ )  |
| Cholesterol                             | 1.01            | 0.91     | 1.04                | 0.74     | 1.24             | 1.26     | 0.006 ( $\alpha$ - $\beta$ ), <0.001 ( $\alpha$ - $\gamma$ )                                 |
| Triglycerides                           | 164.5           | 37.2     | 164.4               | 42.8     | 163.5            | 50.4     | 0.445                                                                                        |
| High density lipoprotein                | 129             | 117      | 160                 | 142      | 156              | 141      | <0.001 ( $\alpha$ - $\beta$ ), 0.001 ( $\alpha$ - $\gamma$ )                                 |
| Low density lipoprotein                 | 47              | 14       | 41                  | 12       | 41               | 12       | <0.001 ( $\alpha$ - $\beta$ ), <0.001 ( $\alpha$ - $\gamma$ )                                |
| High sensitivity Troponin T             | 93              | 31       | 94                  | 37       | 92               | 43       | 0.33                                                                                         |
| Serum Glutamic-Oxaloacetic Transaminase | 113.8           | 541.4    | 983.7               | 1967.2   | 862.1            | 1760     | <0.001 ( $\alpha$ - $\beta$ ), <0.001 ( $\alpha$ - $\gamma$ )                                |
| Serum Glutamic Pyruvic Transaminase     | 27.3            | 41.4     | 81.1                | 352.6    | 60.5             | 109      | <0.001 ( $\alpha$ - $\beta$ ), <0.001 ( $\alpha$ - $\gamma$ )                                |
| Lactate Dehydrogenase                   | 191.1           | 2672.1   | 48                  | 236      | 36.9             | 81.5     | 0.001 ( $\alpha$ - $\beta$ )                                                                 |
| Creatine Phosphokinase                  | 227             | 77       | 366                 | 404      | 399              | 424      | <0.001 ( $\alpha$ - $\beta$ ), <0.001 ( $\alpha$ - $\gamma$ )                                |
| Low ventricular ejection fraction (%)   | 145             | 415      | 523                 | 1227     | 472              | 986      | <0.001 ( $\alpha$ - $\beta$ ), <0.001 ( $\alpha$ - $\gamma$ )                                |
| Total glucose                           | 0.54            | 0.1      | 0.5                 | 0.11     | 0.48             | 0.12     | <0.001 ( $\alpha$ - $\beta$ ), <0.001 ( $\alpha$ - $\gamma$ )                                |

\* Bonferroni corrected for multiple comparisons Kruskal Wallis test

**Table S4.** CAD groups with proteins, ceramide, acylcarnitine and lipid levels

| CAD Groups                 |        |            |            |       |        |            |            |                 |        |            |            |               |        |            |            |                    |                                            |
|----------------------------|--------|------------|------------|-------|--------|------------|------------|-----------------|--------|------------|------------|---------------|--------|------------|------------|--------------------|--------------------------------------------|
| NSTEMI                     |        |            |            | STEMI |        |            |            | Unstable Angina |        |            |            | Stable Angina |        |            |            | P value*<br>(pair) |                                            |
| N                          | Median | ↓95.0% CIs | ↑95.0% CIs | N     | Median | ↓95.0% CIs | ↑95.0% CIs | N               | Median | ↓95.0% CIs | ↑95.0% CIs | N             | Median | ↓95.0% CIs | ↑95.0% CIs |                    |                                            |
| Proteins (N)               |        |            |            |       |        |            |            |                 |        |            |            |               |        |            |            |                    |                                            |
| Galectin (ng/ml) (N=932)   | 164    | 8.41       | 7.6        | 9.4   | 216    | 10         | 9.1        | 10.9            | 136    | 9.36       | 8.87       | 10.9          | 416    | 9.82       | 9.3        | 10.4               | 0.099                                      |
| NGAL(ng/ml)(119)           | 32     | 4.6        | 3          | 6.5   | 26     | 3.95       | 2          | 6.5             | 17     | 1.3        | 0.9        | 2.5           | 44     | 1.8        | 1.3        | 4.5                | 0.009 (δ-γ)<br>0.002 (γ-α)                 |
| Adiponectin (ng/ml)(N=216) | 35     | 162        | 151.7      | 170   | 41     | 164        | 157        | 172             | 38     | 162.5      | 159        | 175           | 102    | 161        | 156        | 168                | 0.957                                      |
| ApoB/ApoA-I(405)           | 66     | 0.86       | 0.77       | 1.15  | 112    | 0.93       | 0.85       | 1.01            | 64     | 0.82       | 0.66       | 0.97          | 163    | 0.75       | 0.68       | 0.86               | 0.11                                       |
| Ceramides(N=915)           |        |            |            |       |        |            |            |                 |        |            |            |               |        |            |            |                    |                                            |
| C16:0                      | 163    | 0.546      | 0.513      | 0.571 | 214    | 0.629      | 0.574      | 0.654           | 134    | 0.52       | 0.48       | 0.54          | 404    | 0.487      | 0.471      | 0.511              | 0.01 (δ-α),<br><0.001 (δ-β),<0.001 (γ-α)   |
| C18:0                      |        | 0.214      | 0.196      | 0.237 |        | 0.243      | 0.225      | 0.272           |        | 0.192      | 0.186      | 0.216         |        | 0.176      | 0.164      | 0.19               | <0.001 (δ-α), <0.001 (δ-β),<br>0.001 (γ-α) |
| C24:0                      |        | 6.802      | 6.144      | 7.922 |        | 7.571      | 7.042      | 8.392           |        | 6.73       | 6.033      | 7.426         |        | 6.845      | 6.52       | 7.324              | 0.020 (γ-β), 0.029 (δ-β)                   |
| C24:1                      |        | 3.137      | 2.889      | 3.66  |        | 3.566      | 3.317      | 3.866           |        | 2.859      | 2.614      | 3.3           |        | 2.962      | 2.872      | 3.146              | 0.001 (γ-β),<0.001 (δ-β)                   |
| Ratio C16:0/C24:0          |        | 0.081      | 0.076      | 0.087 |        | 0.073      | 0.07       | 0.081           |        | 0.073      | 0.069      | 0.078         |        | 0.07       | 0.067      | 0.074              | 0.002 (δ-α)                                |
| Ratio C18:0/C24:0          |        | 0.031      | 0.028      | 0.035 |        | 0.033      | 0.031      | 0.035           |        | 0.031      | 0.026      | 0.034         |        | 0.025      | 0.024      | 0.026              | <0.001 (δ-α), <0.001 (δ-β), 0.01 (δ-γ)     |
| Ratio C24:1/C24:0          |        | 0.457      | 0.434      | 0.511 |        | 0.456      | 0.428      | 0.48            |        | 0.454      | 0.425      | 0.49          |        | 0.436      | 0.419      | 0.459              | 0.329                                      |
| Acyl L-carnitines (N=946)  |        |            |            |       |        |            |            |                 |        |            |            |               |        |            |            |                    |                                            |

|                     |     |         |         |         |     |         |         |         |     |         |         |         |     |         |         |         |                                                                                               |
|---------------------|-----|---------|---------|---------|-----|---------|---------|---------|-----|---------|---------|---------|-----|---------|---------|---------|-----------------------------------------------------------------------------------------------|
| C2                  | 170 | 2906.5  | 2649.44 | 3154.25 | 219 | 2770.56 | 2539.3  | 3045.37 | 140 | 3147.27 | 2839.91 | 3452.4  | 417 | 2969.54 | 2846.84 | 3111.7  | 0.219                                                                                         |
| C3                  |     | 168.35  | 151.99  | 182.39  | 219 | 173.55  | 157.15  | 191.74  | 140 | 181.15  | 167.93  | 196.96  |     | 176.8   | 169.84  | 185.38  | 0.824                                                                                         |
| C4                  |     | 39.92   | 36.2    | 44.81   |     | 38.1    | 35.6    | 42.41   |     | 37.99   | 34.83   | 43.02   |     | 38.62   | 36.74   | 40.81   | 0.782                                                                                         |
| C5                  |     | 24.79   | 23.46   | 28.8    |     | 29.08   | 26.36   | 30.73   |     | 25.13   | 22.86   | 27.7    |     | 25.72   | 24.95   | 27.5    | 0.026 ( $\gamma$ - $\beta$ )                                                                  |
| C6                  |     | 27.46   | 25.83   | 31      |     | 27.58   | 25.65   | 29.1    |     | 30.69   | 27.77   | 33.83   |     | 29.98   | 28.87   | 31.46   | 0.329                                                                                         |
| C8                  |     | 54.66   | 49      | 60.09   |     | 52.99   | 49.11   | 58.13   |     | 56.6    | 51.9    | 66.67   |     | 63.06   | 58.68   | 68.55   | 0.053                                                                                         |
| C10                 |     | 89.88   | 78.25   | 105.42  |     | 86.53   | 79.36   | 94.45   |     | 91.5    | 83.49   | 110.42  |     | 106.09  | 96.74   | 116.37  | 0.019 ( $\delta$ - $\beta$ )                                                                  |
| C12                 |     | 26.54   | 23.7    | 30.2    |     | 27.96   | 25.11   | 29.83   |     | 29.17   | 24.86   | 31.54   |     | 29.88   | 28.26   | 31.39   | 0.377                                                                                         |
| C14                 |     | 17.51   | 16.27   | 19.55   |     | 17.78   | 17.04   | 18.86   |     | 19.28   | 17.52   | 20.69   |     | 19.17   | 18.43   | 19.79   | 0.301                                                                                         |
| C16                 |     | 58.38   | 55.03   | 63.64   |     | 58.29   | 55.82   | 60.89   |     | 62.9    | 60.82   | 66.52   |     | 63.21   | 60.85   | 65.63   | 0.012 ( $\delta$ - $\beta$ )                                                                  |
| C18                 |     | 17.35   | 16.09   | 18.35   |     | 18.63   | 17.76   | 19.54   |     | 18.63   | 17.49   | 19.29   |     | 19.01   | 18.45   | 19.59   | 0.137                                                                                         |
| C18:1               |     | 85.82   | 78.64   | 94.91   |     | 82.8    | 76.43   | 88.61   |     | 91.3    | 79.31   | 97.06   |     | 92.53   | 88.15   | 97.76   | 0.013 ( $\delta$ - $\beta$ )                                                                  |
| C18:2               |     | 54.86   | 50.74   | 59.54   |     | 50.26   | 47.34   | 52.41   |     | 53.75   | 50      | 60.48   |     | 60.21   | 57.89   | 63.29   | <0.001 ( $\delta$ - $\beta$ )                                                                 |
| Fatty Acids (N=462) |     |         |         |         |     |         |         |         |     |         |         |         |     |         |         |         |                                                                                               |
| C10:0               | 91  | 14.67   | 13.87   | 16.13   | 92  | 15.98   | 15.64   | 16.94   | 95  | 16.41   | 15.29   | 17.13   | 184 | 13.18   | 12.11   | 14.02   | <0.001 ( $\delta$ - $\beta$ ), <0.001 ( $\gamma$ - $\delta$ )                                 |
| C12:0               |     | 28.73   | 27.81   | 31.14   |     | 29.44   | 28.54   | 30.65   |     | 29.62   | 28.43   | 31.41   |     | 23.16   | 20.82   | 26.11   | 0.003 ( $\delta$ - $\beta$ ), <0.001 ( $\gamma$ - $\delta$ )                                  |
| C14:0               |     | 49.89   | 41.67   | 59.51   |     | 47.99   | 42.57   | 60.06   |     | 63.19   | 55.12   | 71.9    |     | 50.39   | 43.27   | 58.8    | 0.064                                                                                         |
| C14:1               |     | 42.04   | 40.56   | 46.1    |     | 44.35   | 41.28   | 49.25   |     | 42.63   | 40.58   | 49.2    |     | 33.71   | 32.62   | 35.9    | 0.023 ( $\delta$ - $\beta$ ), 0.042 ( $\gamma$ - $\delta$ )                                   |
| C15:0               |     | 16.28   | 14.15   | 17.78   |     | 15.66   | 14.29   | 17.12   |     | 17.39   | 15.72   | 19.14   |     | 14.99   | 14.01   | 15.87   | 0.005 ( $\delta$ - $\gamma$ )                                                                 |
| C16:0               |     | 1783.42 | 1516.81 | 2180.78 |     | 1806.5  | 1600.63 | 1949.54 |     | 1917.14 | 1644.89 | 2214.48 |     | 1270.19 | 1058.03 | 1424.22 | <0.001 ( $\delta$ - $\alpha$ ), <0.001 ( $\delta$ - $\beta$ ), <0.001 ( $\delta$ - $\gamma$ ) |
| C16:1               |     | 94.15   | 79.93   | 118.22  |     | 99.42   | 83.32   | 113.49  |     | 106.56  | 92.24   | 123.12  |     | 68.97   | 57.24   | 80.95   | <0.001 ( $\delta$ - $\alpha$ ), <0.001 ( $\delta$ - $\beta$ ), <0.001 ( $\delta$ - $\gamma$ ) |

|                  |         |         |         |  |         |         |         |         |         |         |         |         |         |                                                                                               |
|------------------|---------|---------|---------|--|---------|---------|---------|---------|---------|---------|---------|---------|---------|-----------------------------------------------------------------------------------------------|
| <b>C17:0</b>     | 21.01   | 17.67   | 24.46   |  | 20.52   | 17.25   | 22.4    | 22.7    | 18.68   | 24.4    | 13.13   | 11.68   | 15.85   | <0.001 ( $\delta$ - $\alpha$ ), <0.001 ( $\delta$ - $\beta$ ), <0.001 ( $\delta$ - $\gamma$ ) |
| <b>C17:1</b>     | 117.66  | 116.37  | 119.77  |  | 116.88  | 115.79  | 118.2   | 117.93  | 117.12  | 122.37  | 98.18   | 80.71   | 112.47  | <0.001 ( $\delta$ - $\alpha$ ), <0.001 ( $\delta$ - $\beta$ ), <0.001 ( $\delta$ - $\gamma$ ) |
| <b>C18:0</b>     | 479.75  | 418.05  | 581.89  |  | 515.56  | 411.87  | 602.13  | 549.42  | 458.23  | 632.56  | 373.24  | 300.2   | 431.84  | 0.003 ( $\delta$ - $\alpha$ ), 0.002 ( $\delta$ - $\beta$ ), <0.001 ( $\delta$ - $\gamma$ )   |
| <b>cis_C18:1</b> | 1828.52 | 1687.32 | 2170.46 |  | 1765.11 | 1571.01 | 2024.97 | 1967.38 | 1721.87 | 2258.5  | 1413.07 | 1286.01 | 1575.49 | <0.001 ( $\delta$ - $\alpha$ ), 0.002 ( $\delta$ - $\beta$ ), <0.001 ( $\delta$ - $\gamma$ )  |
| <b>cis_C18:2</b> | 1852.94 | 1633.86 | 2049.21 |  | 1898.33 | 1699.97 | 2056.83 | 1903.79 | 1696.14 | 2232.47 | 1775.62 | 1600.89 | 1975.63 | 0.583                                                                                         |
| <b>C18:3 n6</b>  | 102.55  | 98.75   | 107.07  |  | 109.46  | 101.82  | 115.19  | 108.91  | 103.83  | 118.88  | 96.21   | 93.98   | 101.7   | 0.003 ( $\delta$ - $\beta$ ), <0.001 ( $\delta$ - $\gamma$ )                                  |
| <b>C18:3 n3</b>  | 90.57   | 85      | 97      |  | 94.93   | 89.27   | 99.13   | 96.43   | 90.85   | 99.01   | 83.57   | 81.96   | 84.79   | 0.004 ( $\delta$ - $\alpha$ ), <0.001 ( $\delta$ - $\beta$ ), <0.001 ( $\delta$ - $\gamma$ )  |
| <b>C20:1n11</b>  | 60.52   | 56.47   | 61.49   |  | 60.45   | 59.25   | 61.62   | 60.93   | 59.75   | 62.37   | 62.36   | 61.64   | 63.3    | 0.003 ( $\delta$ - $\beta$ )                                                                  |
| <b>C21:0</b>     | 7.08    | 6.06    | 7.6     |  | 7.13    | 6.2     | 7.66    | 7.34    | 6.98    | 7.64    | 7       | 6.94    | 7.05    | 0.185                                                                                         |
| <b>C20:2 cis</b> | 44.22   | 41.78   | 46.71   |  | 42.41   | 40.59   | 43.22   | 44.36   | 43.11   | 46.26   | 63.81   | 47.96   | 65.68   | <0.001 ( $\delta$ - $\beta$ )                                                                 |
| <b>C22:0</b>     | 73.71   | 63.53   | 74.97   |  | 74.51   | 73.15   | 75.63   | 74.07   | 72.4    | 75.38   | 48.56   | 47.58   | 51.34   | <0.001 ( $\delta$ - $\alpha$ ), <0.001 ( $\delta$ - $\beta$ ), <0.001 ( $\delta$ - $\gamma$ ) |



|              |    |        |        |        |    |        |        |        |    |        |        |        |        |        |        |                                                                                               |                                                                                              |
|--------------|----|--------|--------|--------|----|--------|--------|--------|----|--------|--------|--------|--------|--------|--------|-----------------------------------------------------------------------------------------------|----------------------------------------------------------------------------------------------|
| C20:3 w6     |    | 101.15 | 90.57  | 114.25 |    | 104.12 | 92.04  | 114.01 |    | 105.53 | 95.31  | 115.33 | 83.78  | 75.55  | 92.55  | 0.007 ( $\delta$ - $\alpha$ ), 0.005 ( $\delta$ - $\beta$ ), 0.003 ( $\delta$ - $\gamma$ )    |                                                                                              |
|              |    |        |        |        |    |        |        |        |    |        |        |        |        |        |        |                                                                                               |                                                                                              |
| C20:4 w6     |    | 394.16 | 367.48 | 452.8  |    | 378.79 | 323.35 | 414.4  |    | 406.65 | 379.62 | 462.35 | 347.42 | 321.03 | 368.23 | 0.042 ( $\delta$ - $\alpha$ ), 0.012 ( $\delta$ - $\gamma$ )                                  |                                                                                              |
| C23:0        |    | 9.48   | 7.67   | 10.13  |    | 10.39  | 9.06   | 10.83  |    | 9.97   | 8.8    | 10.79  | 4.81   | 4.36   | 5.73   | <0.001 ( $\delta$ - $\alpha$ ), <0.001 ( $\delta$ - $\beta$ ), <0.001 ( $\delta$ - $\gamma$ ) |                                                                                              |
| C20:5 w3 cis |    | 64.11  | 62.87  | 67.2   |    | 64.74  | 63.59  | 65.49  |    | 66.14  | 64.54  | 68.77  | 64.19  | 62.93  | 65.58  | 0.306                                                                                         |                                                                                              |
| C24:0        |    | 62.57  | 60.94  | 67.55  |    | 67.07  | 62.41  | 68.66  |    | 65.08  | 61.19  | 68.42  | 43.39  | 40.58  | 46.08  | <0.001 ( $\delta$ - $\alpha$ ), <0.001 ( $\delta$ - $\beta$ ), <0.001 ( $\delta$ - $\gamma$ ) |                                                                                              |
| C24:1        | 90 | 67.34  | 65.38  | 68.55  | 88 | 66.47  | 64.43  | 67.51  | 94 | 67.34  | 65.36  | 69.46  | 181    | 63.44  | 62.49  | 64.39                                                                                         | <0.001 ( $\delta$ - $\alpha$ ), 0.002 ( $\delta$ - $\beta$ ), <0.001 ( $\delta$ - $\gamma$ ) |
| C22:6 w3 cis |    | 95.63  | 91.47  | 100.97 |    | 100.87 | 92.5   | 106.34 |    | 102.09 | 95.85  | 110.54 | 93.92  | 90.43  | 98.55  | 0.169                                                                                         |                                                                                              |

\* Bonferroni corrected for multiple comparisons Kruskal Wallis test

**Table S5.** Serum levels of proteins, ceramides and acyl-carnitines by CAD severity

| Syntax Score Groups        |       |         |            |            |             |         |            |            |         |         |            |            |                           |
|----------------------------|-------|---------|------------|------------|-------------|---------|------------|------------|---------|---------|------------|------------|---------------------------|
|                            | 0 (α) |         |            |            | 1 to 22 (β) |         |            |            | >22 (γ) |         |            |            | P value (pair) *          |
|                            | N     | Median  | ↓95.0% CIs | ↑95.0% CIs | N           | Median  | ↓95.0% CIs | ↑95.0% CIs | N       | Median  | ↓95.0% CIs | ↑95.0% CIs |                           |
| Proteins (N)               |       |         |            |            |             |         |            |            |         |         |            |            |                           |
| Galectin (ng/ml) (N=932)   | 270   | 10.3    | 9.3        | 10.9       | 457         | 9.1     | 8.7        | 9.77       | 205     | 10.1    | 9.55       | 11.27      | 0.065 (β-γ)               |
| NGAL(ng/ml)(119)           | 22    | 1.75    | 0.7        | 5.3        | 57          | 2.4     | 1.8        | 4.2        | 40      | 3.2     | 1.9        | 6.5        | 0.29                      |
| Adiponectin (ng/ml)(N=216) | 48    | 168     | 160        | 173        | 100         | 160     | 156        | 169        | 68      | 161.1   | 156        | 167        | 0.856                     |
| ApoB/ApoA-I(405)           | 134   | 0.69    | 0.63       | 0.8        | 194         | 0.88    | 0.82       | 0.96       | 77      | 0.86    | 0.76       | 1.05       | 0.005 (α-β )              |
| Ceramides (N=915)          |       |         |            |            |             |         |            |            |         |         |            |            |                           |
| C16:0                      | 269   | 0.517   | 0.476      | 0.533      | 443         | 0.526   | 0.507      | 0.55       | 203     | 0.547   | 0.528      | 0.572      | 0.052 (α-γ)               |
| C18:0                      | 269   | 0.187   | 0.171      | 0.208      | 443         | 0.202   | 0.19       | 0.214      | 203     | 0.209   | 0.197      | 0.229      | 0.049 (α-β ), 0.032 (α-γ) |
| C24:0                      | 269   | 6.76    | 6.324      | 7.434      | 443         | 7.195   | 6.648      | 7.443      | 203     | 7.272   | 6.725      | 7.657      | 0.592                     |
| C24:1                      | 269   | 2.906   | 2.837      | 3.197      | 443         | 3.18    | 3.069      | 3.352      | 203     | 3.223   | 3.06       | 3.506      | 0.052 (α-γ)               |
| Ratio C16:0/C24:0          | 269   | 0.072   | 0.067      | 0.075      | 443         | 0.073   | 0.071      | 0.076      | 203     | 0.077   | 0.071      | 0.082      | 0.168                     |
| Ratio C18:0/C24:0          | 269   | 0.026   | 0.025      | 0.028      | 443         | 0.03    | 0.028      | 0.031      | 203     | 0.029   | 0.027      | 0.032      | 0.052 (α-β ), 0.055 (α-γ) |
| Ratio C24:1/C24:0          | 269   | 0.434   | 0.414      | 0.452      | 443         | 0.459   | 0.435      | 0.475      | 203     | 0.454   | 0.43       | 0.48       | 0.19                      |
| Acyl L-carnitines (N=946)  |       |         |            |            |             |         |            |            |         |         |            |            |                           |
| C2                         | 273   | 3013.09 | 2848.26    | 3146.54    | 466         | 2841.43 | 2652.45    | 3047.79    | 207     | 2951.55 | 2798.57    | 3325.86    | 0.132                     |
| C3                         | 273   | 171.49  | 162.86     | 179.56     | 466         | 175.68  | 167.86     | 184.94     | 207     | 186.56  | 170.45     | 209.04     | 0.084                     |
| C4                         | 273   | 36.96   | 34.21      | 40.46      | 466         | 37.95   | 35.6       | 40.18      | 207     | 45.16   | 38.94      | 49.61      | 0.002 (α-γ), 0.005 (β-γ)  |
| C5                         | 273   | 25.25   | 23.99      | 26.36      | 466         | 26.41   | 24.95      | 28.63      | 207     | 27.82   | 25.34      | 30.79      | 0.024 (α-γ)               |
| C6                         | 273   | 29.81   | 28.07      | 33.04      | 466         | 28.89   | 27.63      | 30.08      | 207     | 28.88   | 27.1       | 31.34      | 0.889                     |
| C8                         | 273   | 60.09   | 56.03      | 66.36      | 466         | 57.65   | 53.41      | 61.45      | 207     | 55.13   | 49.58      | 62.7       | 0.521                     |
| C10                        | 273   | 99.63   | 90.03      | 109.52     | 466         | 94.48   | 86.47      | 101.15     | 207     | 92.32   | 80.54      | 104.81     | 0.43                      |
| C12                        | 273   | 29.55   | 27.41      | 31.17      | 466         | 28.53   | 26.63      | 30.33      | 207     | 27.73   | 25.11      | 29.71      | 0.445                     |
| C14                        | 273   | 19.24   | 18.12      | 20.36      | 466         | 18.54   | 17.59      | 19.27      | 207     | 18.21   | 17.06      | 19.69      | 0.229                     |

|                     |     |         |         |         |     |         |         |         |     |         |         |         |                                                             |
|---------------------|-----|---------|---------|---------|-----|---------|---------|---------|-----|---------|---------|---------|-------------------------------------------------------------|
| C16                 | 273 | 65.18   | 62.57   | 67.9    | 466 | 60.28   | 57.95   | 62.48   | 207 | 59.27   | 56.28   | 61.94   | 0.044 ( $\alpha$ - $\beta$ ), 0.031( $\alpha$ - $\gamma$ )  |
| C18                 | 273 | 19.11   | 18.27   | 20.08   | 466 | 18.39   | 17.7    | 19.03   | 207 | 18.18   | 17.5    | 19.08   | 0.166                                                       |
| C18:1               | 273 | 91.7    | 85.27   | 98.82   | 466 | 88.03   | 82.8    | 92.55   | 207 | 87.63   | 80.05   | 93.49   | 0.392                                                       |
| C18:2               | 273 | 60.48   | 56.37   | 64.61   | 466 | 53.83   | 51.35   | 56.62   | 207 | 53.28   | 49.37   | 57.57   | 0.019 ( $\alpha$ - $\beta$ ), 0.012 ( $\alpha$ - $\gamma$ ) |
| Fatty Acids (N=462) |     |         |         |         |     |         |         |         |     |         |         |         |                                                             |
| C10:0               | 139 | 14.94   | 14.12   | 16.05   | 225 | 15.29   | 14.05   | 15.86   | 98  | 14.29   | 13.67   | 16.09   | 0.846                                                       |
| C12:0               | 139 | 28.38   | 26.4    | 29.56   | 225 | 28.7    | 27.96   | 29.47   | 98  | 26.69   | 21.75   | 28.09   | 0.107                                                       |
| C14:0               | 139 | 55.96   | 50.6    | 62.71   | 225 | 53.33   | 47      | 61.4    | 98  | 46.89   | 40.88   | 55.89   | 0.127                                                       |
| C14:1               | 139 | 40.84   | 34.73   | 43.44   | 225 | 41.14   | 40.35   | 42.06   | 98  | 40.76   | 31.05   | 48.63   | 0.589                                                       |
| C15:0               | 139 | 16.02   | 14.85   | 16.84   | 225 | 15.78   | 14.96   | 16.67   | 98  | 15.2    | 13.95   | 17.1    | 0.943                                                       |
| C16:0               | 139 | 1544.06 | 1362.65 | 1673.26 | 225 | 1643.83 | 1555.12 | 1828.46 | 98  | 1609.08 | 1372.24 | 1859.12 | 0.352                                                       |
| C16:1               | 139 | 85.08   | 76.05   | 105.34  | 225 | 92.22   | 82.63   | 98.1    | 98  | 78.78   | 73.05   | 94.68   | 0.37                                                        |
| C17:0               | 139 | 17.67   | 14.4    | 19.79   | 225 | 18.22   | 16.75   | 20.42   | 98  | 18.14   | 14.72   | 20.4    | 0.543                                                       |
| C17:1               | 139 | 115.78  | 114.35  | 116.85  | 225 | 115.56  | 114.8   | 116.39  | 98  | 117.46  | 116     | 118.72  | 0.036 ( $\alpha$ - $\gamma$ )                               |
| C18:0               | 139 | 446.6   | 396.67  | 505.74  | 225 | 467.38  | 412.25  | 529.82  | 98  | 446.83  | 347.43  | 522.85  | 0.859                                                       |
| cis_C18:1           | 139 | 1550.19 | 1388.97 | 1709.86 | 225 | 1814.8  | 1687.32 | 1893.56 | 98  | 1648.71 | 1470.54 | 1804.82 | 0.022 ( $\alpha$ - $\beta$ )                                |
| cis_C18:2           | 139 | 1915.14 | 1719.39 | 2020.69 | 225 | 1834.87 | 1678.13 | 1931.15 | 98  | 1859.13 | 1607.59 | 2101.85 | 0.874                                                       |
| C18:3 n6            | 139 | 103.83  | 100.34  | 110.49  | 225 | 103.52  | 100.49  | 107.56  | 98  | 101.51  | 98.75   | 106.37  | 0.636                                                       |
| C18:3 n3            | 139 | 90.05   | 84.82   | 94.49   | 225 | 89.27   | 85.42   | 91.73   | 98  | 89.38   | 85      | 96.64   | 0.64                                                        |
| C20:1n11            | 139 | 61.57   | 60.34   | 62.37   | 225 | 61.5    | 60.75   | 62.1    | 98  | 60.9    | 59.81   | 61.78   | 0.909                                                       |
| C21:0               | 139 | 7.03    | 6.97    | 7.16    | 225 | 6.98    | 6.89    | 7.08    | 98  | 7.23    | 7.08    | 7.49    | 0.116                                                       |
| C20:2 cis           | 139 | 46.07   | 43.97   | 49.28   | 225 | 44.36   | 43.14   | 46.91   | 98  | 45.8    | 43.24   | 50.49   | 0.597                                                       |
| C22:0               | 139 | 60.37   | 49.64   | 73.87   | 225 | 68.91   | 52.81   | 74.07   | 98  | 63.08   | 54.44   | 73.9    | 0.739                                                       |
| C20:3 w6            | 139 | 95.31   | 86.93   | 102.27  | 225 | 96.86   | 87.79   | 106.25  | 98  | 94.81   | 85.71   | 102.63  | 0.708                                                       |
| C20:4 w6            | 139 | 360.33  | 336.72  | 392.46  | 225 | 383.75  | 352.4   | 406.41  | 98  | 386.27  | 333.97  | 414.34  | 0.685                                                       |
| C23:0               | 139 | 7.85    | 5.57    | 9.59    | 225 | 8.14    | 6.49    | 9.63    | 98  | 7.83    | 5.97    | 9.86    | 0.695                                                       |
| C20:5 w3 cis        | 139 | 65.33   | 63.98   | 66.75   | 225 | 63.97   | 63.14   | 64.98   | 98  | 65.53   | 64.11   | 68.07   | 0.108                                                       |

|                     |     |       |       |       |     |       |       |        |    |        |       |        |       |
|---------------------|-----|-------|-------|-------|-----|-------|-------|--------|----|--------|-------|--------|-------|
| <b>C24:0</b>        | 139 | 61.29 | 46.08 | 64.93 | 225 | 61.54 | 59.94 | 62.56  | 98 | 59.63  | 48.34 | 67.55  | 0.76  |
| <b>C24:1</b>        | 138 | 64.22 | 63.36 | 65.12 | 218 | 65.36 | 63.87 | 66.63  | 97 | 66.49  | 64.91 | 67.62  | 0.135 |
| <b>C22:6 w3 cis</b> | 139 | 96.86 | 91.97 | 100.2 | 225 | 94.29 | 91.86 | 100.69 | 98 | 100.57 | 94.83 | 105.82 | 0.282 |

\* Bonferroni corrected for multiple comparisons Kruskal Wallis test
